# Supplementary material for: A two-in-one dual channel chemosensor for Fe3+and Cu2+with nanomolar detection mimicking the IMPLICATION logic gate
Source: Royal Society of Chemistry journal article supplement (doi:10.1039/c4tc02147a), 2014-11-03
Supplement: c4tc02147a1.pdf [file c4tc02147a1.pdf]

## Supporting Information

### A two-in-one dual channel chemosensor for Fe<sup>3+</sup> and Cu<sup>2+</sup> with nanomolar detection mimicking IMPLICATION logic gate

Anil Kuwar<sup>\*a</sup>, Rahul Patil<sup>a</sup>, Amanpreet Singh<sup>b</sup>, Suban K. Sahoo<sup>c</sup>, Jaromir Marek<sup>d</sup>, Narinder Singh<sup>\*b</sup>,

<sup>a</sup>School of Chemical Sciences, North Maharashtra University, Jalgaon-425001 (MS), India.

<sup>b</sup>Department of Chemistry, Indian Institute of Technology, Ropar, Rupanagar, (Punjab), India.

<sup>c</sup>Department of Applied Chemistry, SV National Institute of Technology, Surat-395007 (Gujrat), India.

<sup>d</sup>Central European Institute of Technology, Masaryk University, Kamenice 562500 Brno, Czech Republic.

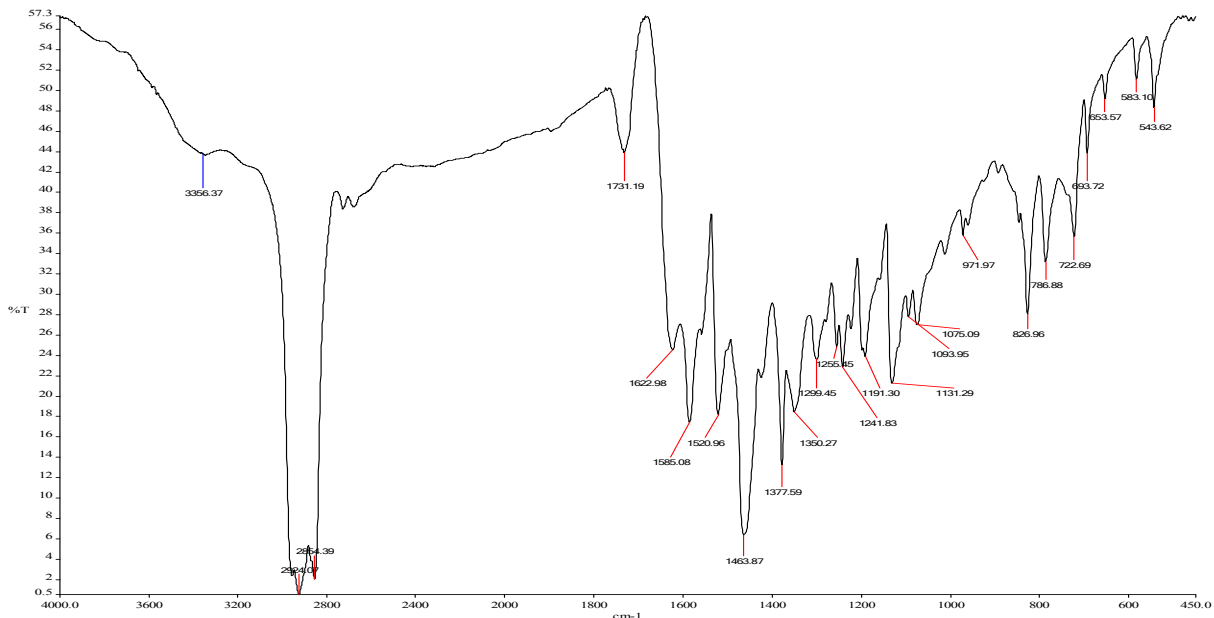

Figure S1: IR Spectra of receptor 1

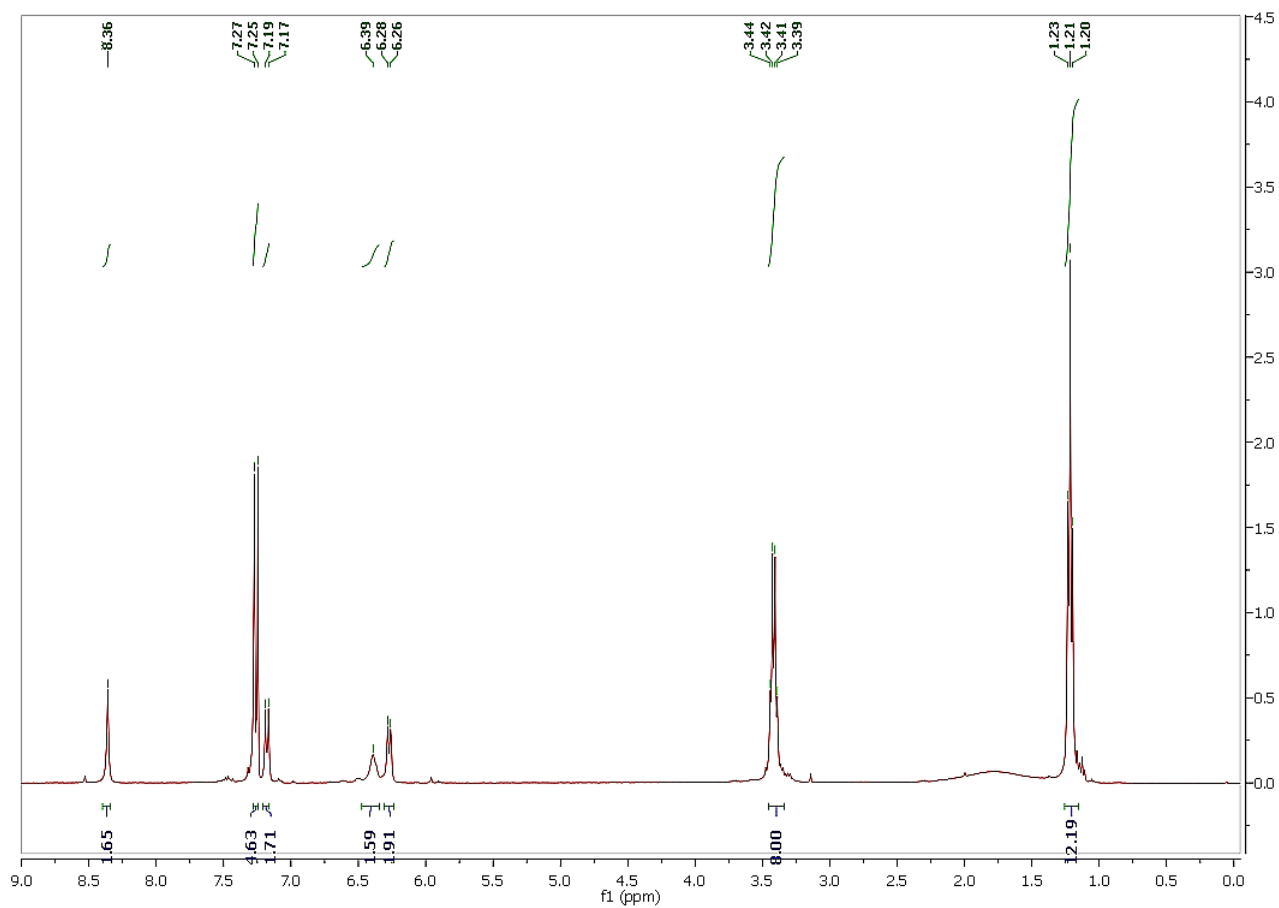

Figure S2: <sup>1</sup>H-NMR spectra of receptor 1

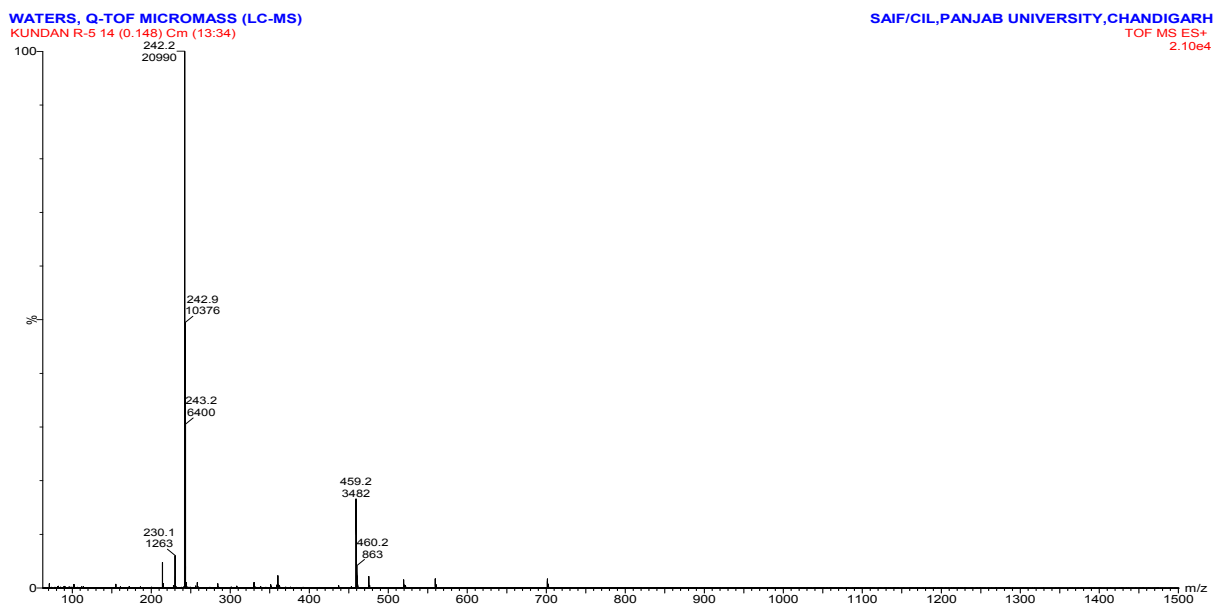

Figure S3- Mass spectra of receptor 1

**Table S1-** Crystal data and structure refinement for receptor 1

| <b>Identification code</b>        | <b>Receptor 1</b>                                             |                |
|-----------------------------------|---------------------------------------------------------------|----------------|
| Empirical formula                 | C <sub>28</sub> H <sub>34</sub> N <sub>4</sub> O <sub>2</sub> |                |
| Formula weight                    | 458.3                                                         |                |
| Temperature                       | 120 K                                                         |                |
| Wavelength                        | 0.71073 Å                                                     |                |
| Crystal system                    | Monoclinic                                                    |                |
| Space group                       | P1 21/n 1                                                     |                |
| Unit cell dimensions              | a = 7.7300(15) Å                                              | α = 79.75°.    |
|                                   | b = 11.040(2) Å                                               | β = 87.94(3)°. |
|                                   | c = 14.680(3) Å                                               | γ = 89.29(3)°. |
| Volume                            | 1231.19(4) Å <sup>3</sup>                                     |                |
| Z                                 | 2                                                             |                |
| Density (calculated)              | 1.134 Mg/m <sup>3</sup>                                       |                |
| Absorption coefficient            | 0.07 mm <sup>-1</sup>                                         |                |
| F(000)                            | 450                                                           |                |
| Theta range for data collection   | 4.06 to 75.66°.                                               |                |
| Index ranges                      | -9 ≤ h ≤ 8, -13 ≤ k ≤ 13, -17 ≤ l ≤ 17                        |                |
| Reflections collected             | 13118                                                         |                |
| Independent reflections           | 3622 [R(int) = 0.032]                                         |                |
| Completeness to theta = 67.50°    | 99.9 %                                                        |                |
| Absorption correction             | Analytical                                                    |                |
| Max. and min. transmission        | 0.810 and 0.638                                               |                |
| Refinement method                 | Full-matrix least-squares on F <sup>2</sup>                   |                |
| Data / restraints / parameters    | 3245 / 23 / 219                                               |                |
| Goodness-of-fit on F <sup>2</sup> | 1.14                                                          |                |
| Final R indices [I > 2σ(I)]       | R1 = 0.0387, wR2 = 0.0993                                     |                |
| R indices (all data)              | R1 = 0.0414, wR2 = 0.1022                                     |                |
| Extinction coefficient            | 0.0015(5)                                                     |                |
| Largest diff. peak and hole       | 0.34 and -0.32 e.Å <sup>-3</sup>                              |                |

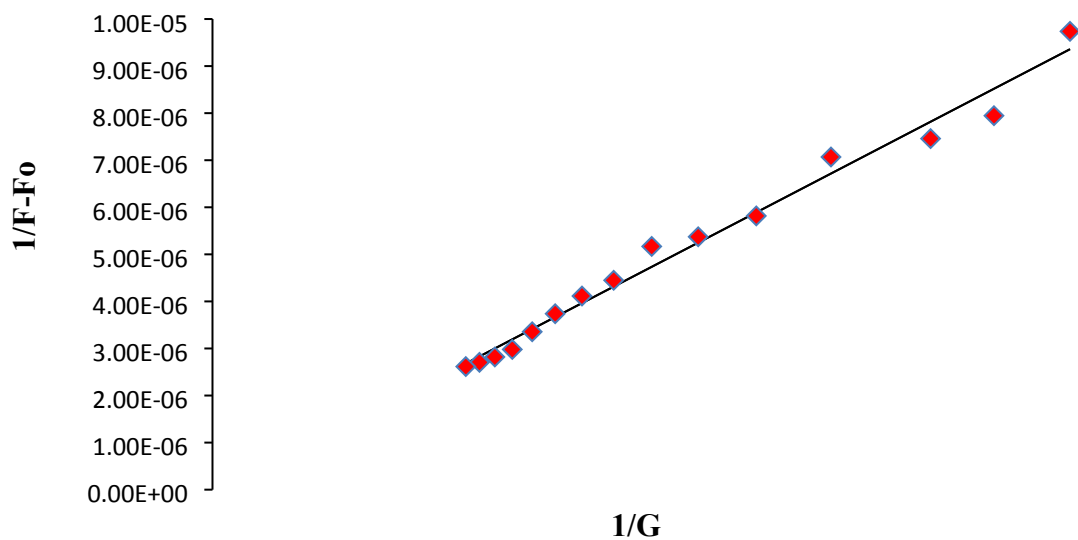

**Figure S4** Benesi-Hildebrand Plot (adjusted equation:  $1/F-F_0 = -1E-11x + 1E-07$   $1/[G]$ ,  $R=0.984$ ) and the K value for  $Fe^{3+}$  at  $70000 M^{-1}$ .

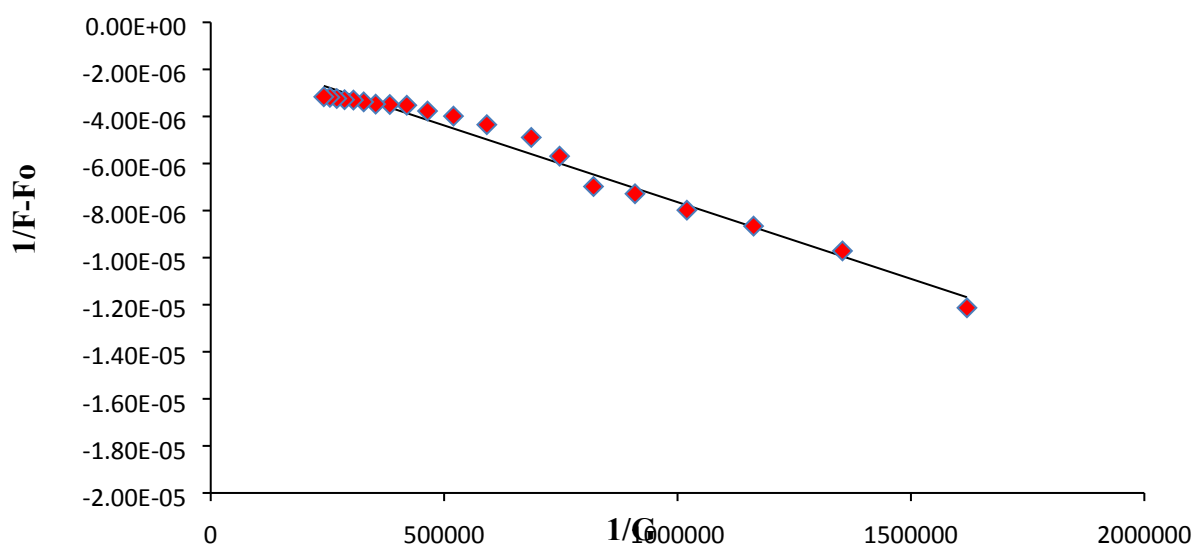

**Figure S5** Benesi-Hildebrand Plot (adjusted equation:  $1/F-F_0 = -7E-12x + 1E-06$   $1/[G]$ ,  $R=0.978$ ) and the K value for  $Cu^{2+}$  at  $857143 M^{-1}$ .

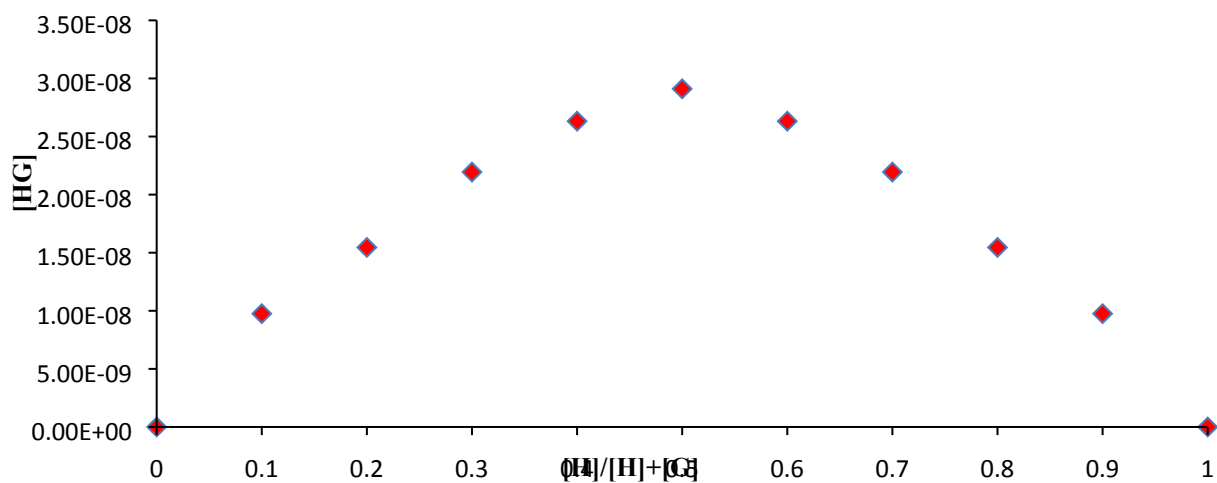

**Figure S6** 1:1 Stoichiometry of the host guest relationship realised from the Job's plot for receptor **1** with Fe<sup>3+</sup>.

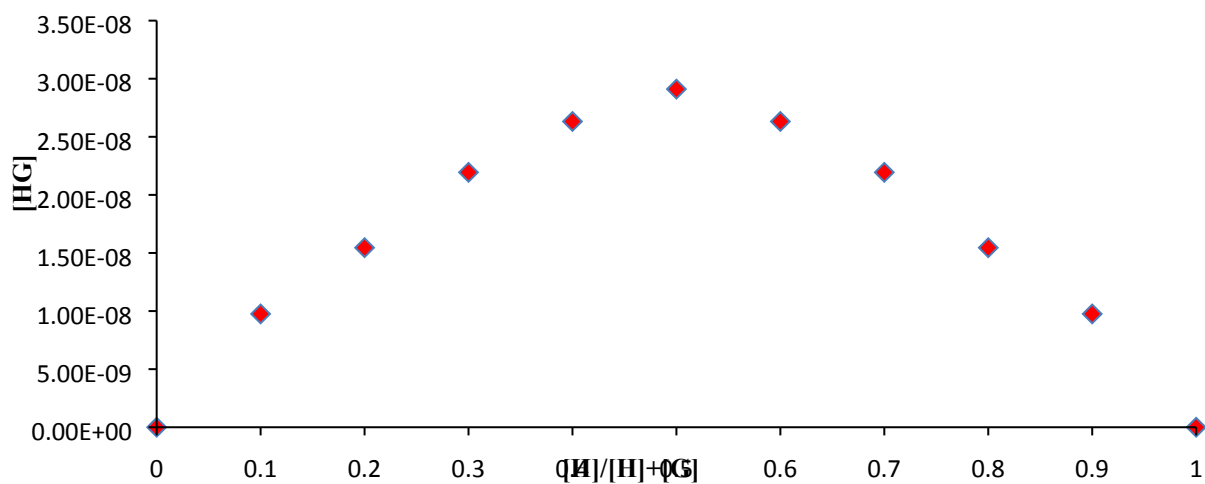

**Figure S7** 1:1 Stoichiometry of the host guest relationship realised from the Job's plot for receptor **1** with Cu<sup>2+</sup>.

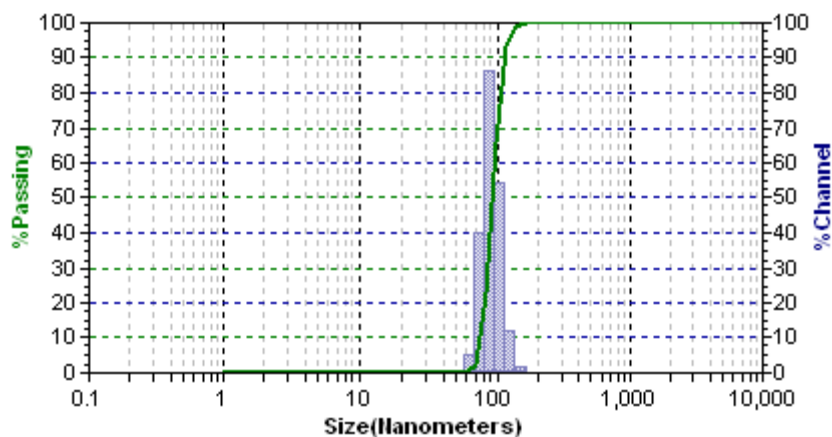

**Figure S8.** DLS histograms of R1 (showing average particle size = 89 nm) in CH<sub>3</sub>CN/H<sub>2</sub>O (1:99, v/v).

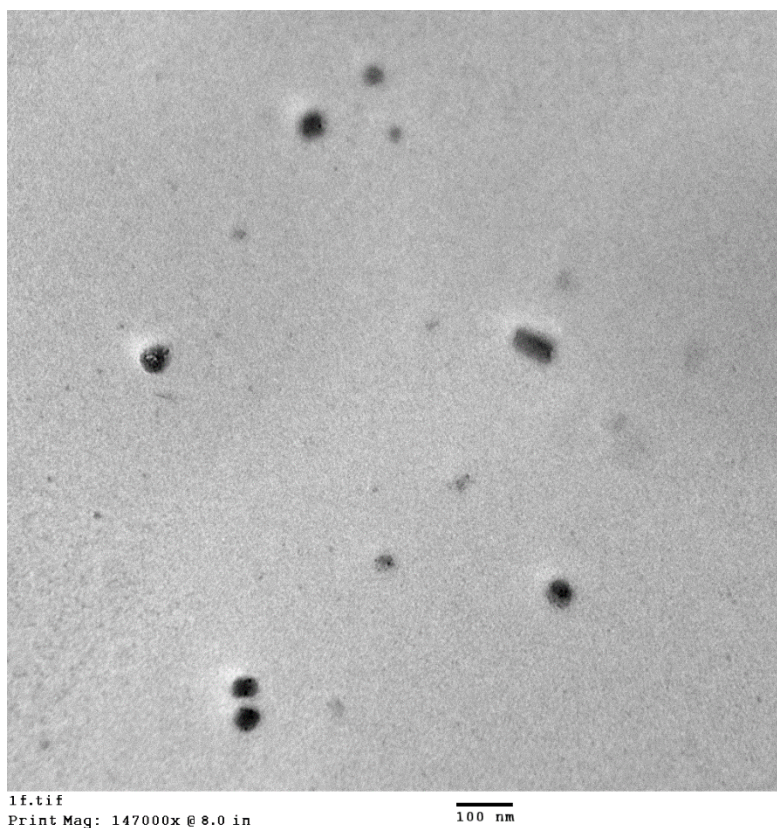

**Figure S9.** TEM image of R1 (showing average particle size = 80 nm)

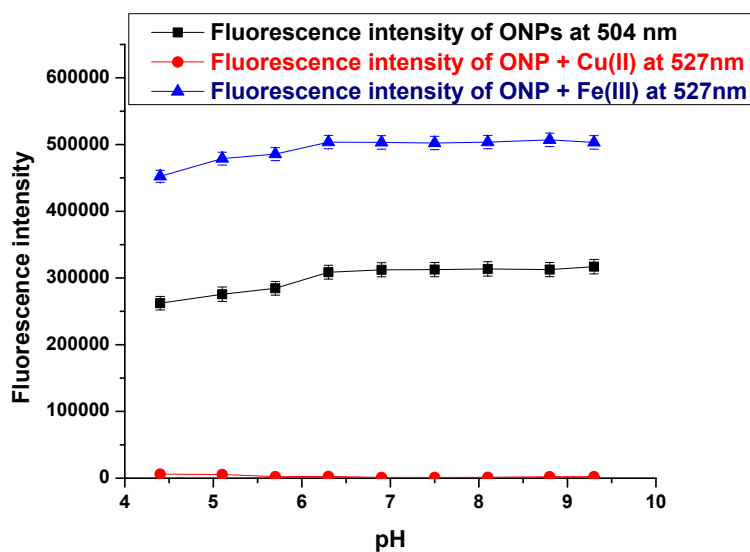

**Figure S10.** Effect of pH on emission profile of ONP and detection of Cu(II) and Fe(III) in aqueous medium.

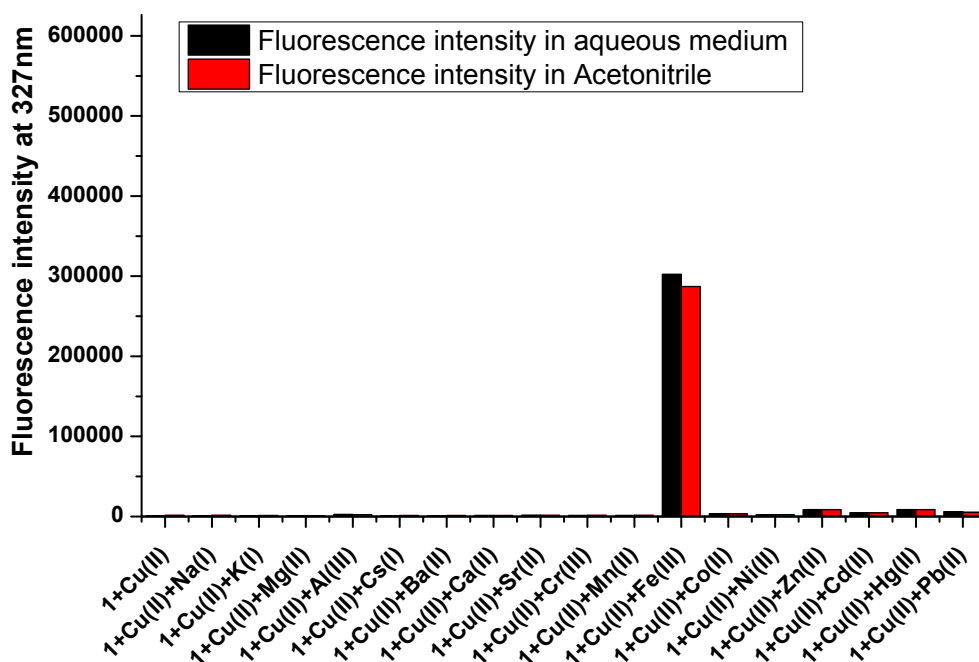

**Figure S11.** Competitive binding of  $\text{Cu}^{2+}$  with Receptor 1 in presence of  $50 \mu\text{M}$  of  $\text{Cu}^{2+}$  and  $50 \mu\text{M}$  of other competing cations.

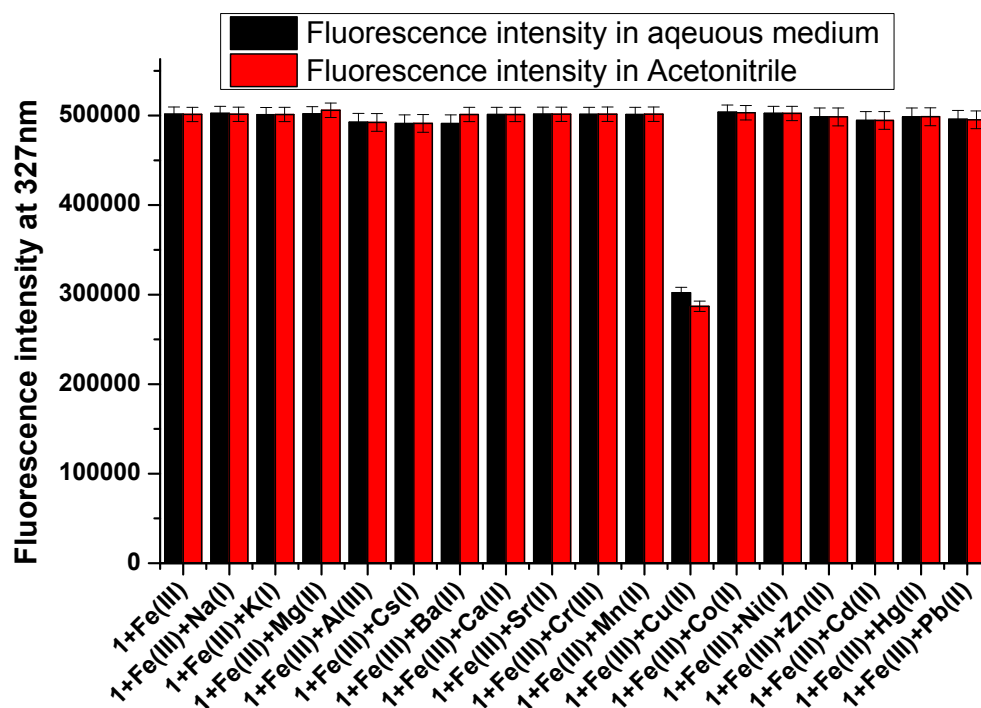

**Figure S12.** Competitive binding of  $\text{Fe}^{3+}$  with Receptor 1 in presence of  $50 \mu\text{M}$  of  $\text{Fe}^{3+}$  and  $50 \mu\text{M}$  of other competing cations.

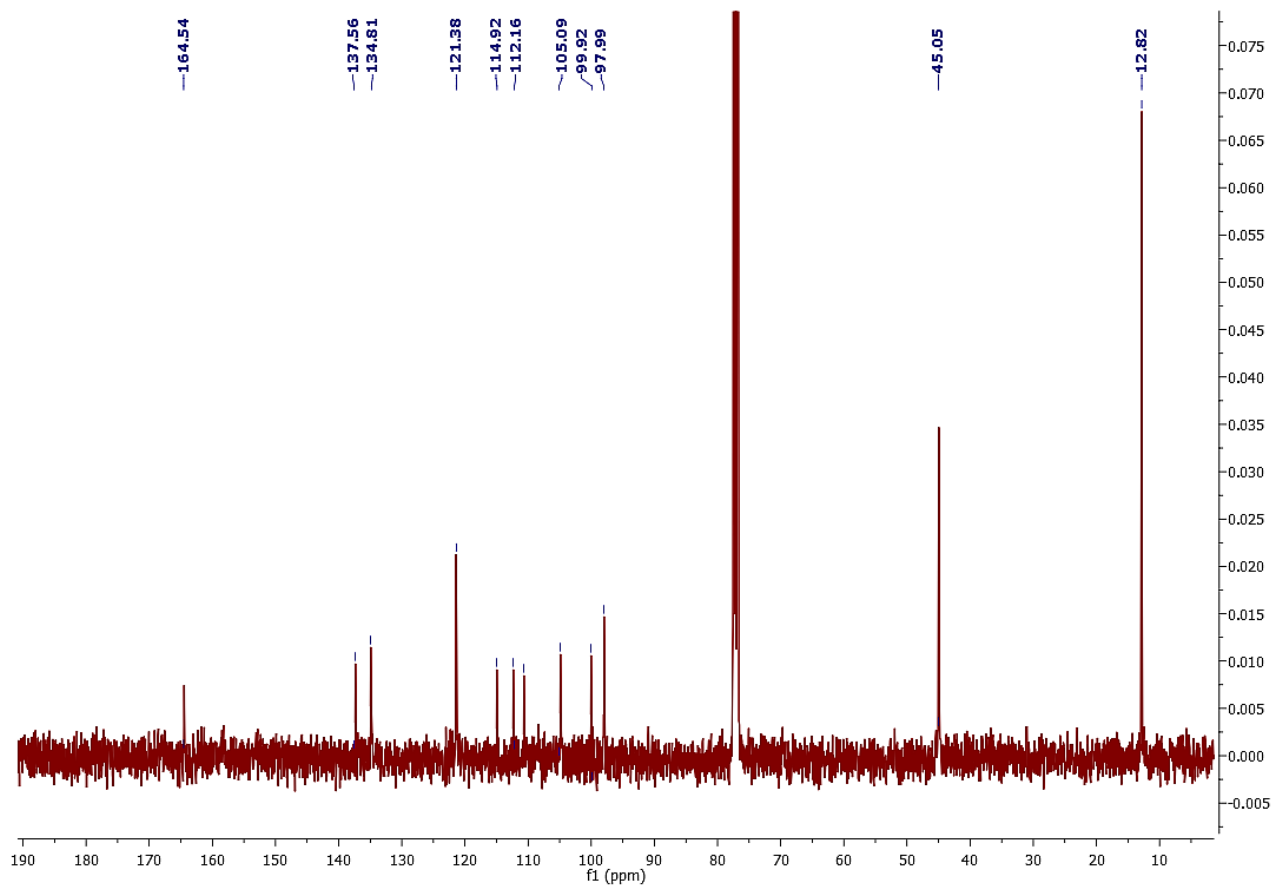

Figure S13:  $^{13}\text{C}$  NMR spectra of receptor 1.



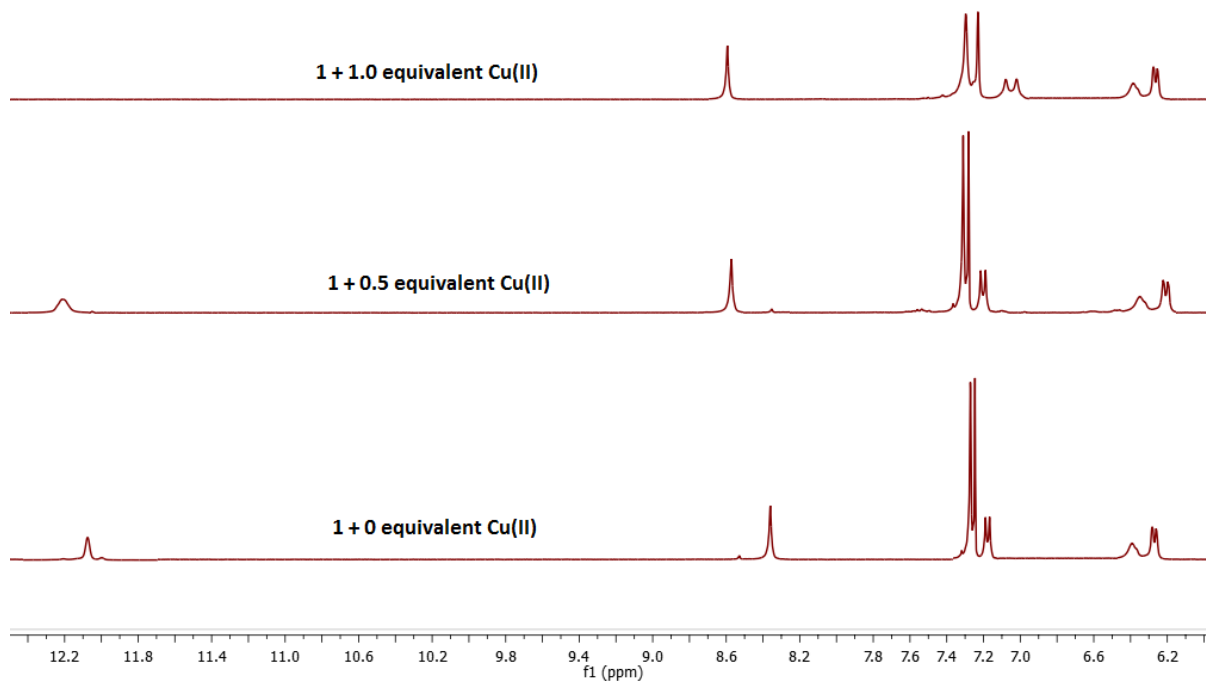

**Figure S14.** NMR spectra of 1 upon addition of different equivalent of Cu(II) ion.

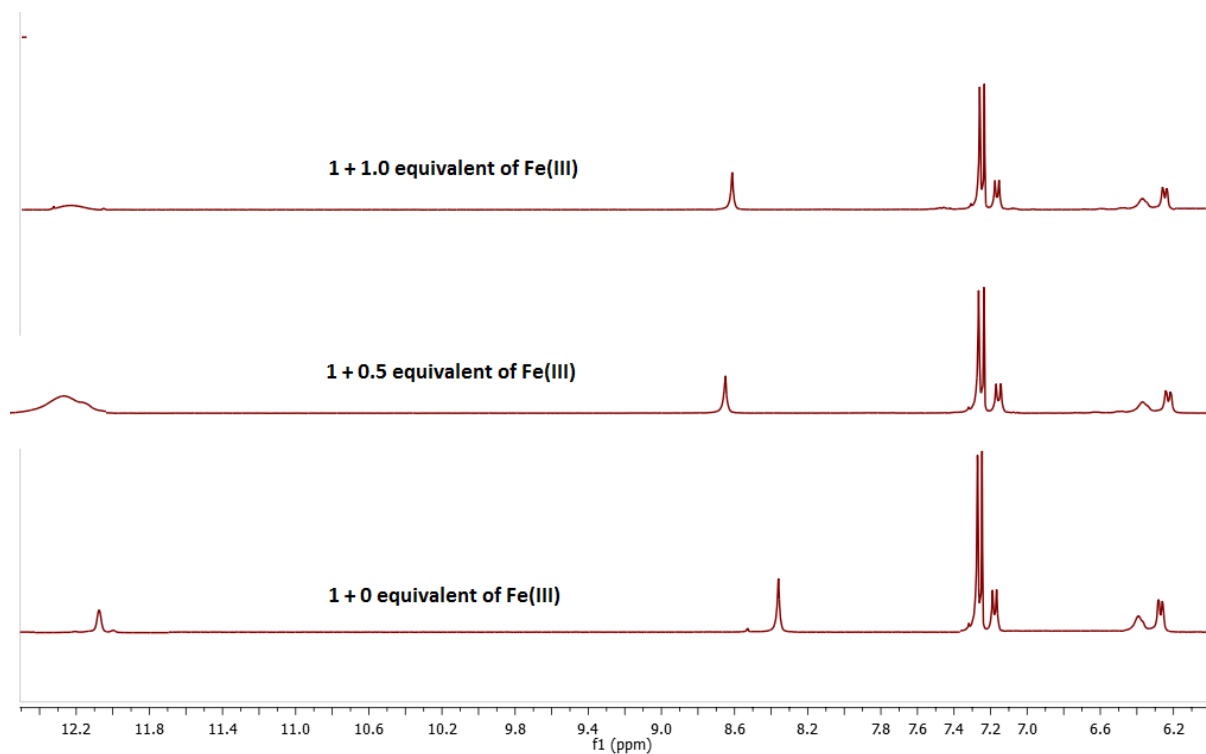

**Figure S15.** NMR spectra of 1 upon addition of different equivalent of Fe (III) ion.
